# Supplementary material for: An AMPK-dependent, non-canonical p53 pathway plays a key role in adipocyte metabolic reprogramming
Source: eLife. 2020 Dec 15;9:e63665. doi: 10.7554/eLife.63665 (PMC7758072; doi:10.7554/eLife.63665)
Supplement: Figure 1—source data 1. [file elife-63665-fig1-data1.xlsx]

## Sheet: Figure-1
Fig. 1A
	test-1	test-2	test-3	Ave	SD
Control	109	82	108	99.6667	15.308
Fasting	197	165	210	190.667	23.1589
Refeeding	116	98	119	111	11.3578
Fig. 1B
	test-1	test-2	test-3	Ave	SD
Control	92	105	103	100	7
HFD	336	303	296	311.667	21.362
Fig. 1C
	test-1	test-2	test-3	Ave	SD
Control	110	92	98	100	9.16515
HFD	231	278	259	256	23.6432
Fig. 1D
	Control-A		Fasting		Refeeding
	Ave	SD	Ave	SD	Ave	SD
p21	100	15	97	12	95	10
Gadd45	100	10	102	17	105	11
Cdkn2a	100	7	105	14	93	18
Atm	100	14	94	13	110	13
Bax	100	8	104	17	99	11
Caps2	100	7	100	10	92	15
Fig. 1E
	LFD		HFD(3 days)		HFD(12 weeks)
	Ave	SD	Ave	SD	Ave	SD
p21	100	15	105	31	370	39
Gadd45	100	21	97	23	450	41
Cdkn2a	100	18	110	21	290	42
Atm	100	21	95	35	370	39
Bax	100	19	104	28	410	45
Caps2	100	8	89	40	320	34
Fig. 1G
	Control		Fasted		Refed		Doxorubicin
	Ave	SD	Ave	SD	Ave	SD	Ave	SD
p21	100	13	105	8	97	9	341	29
Gadd45	100	14	111	10	102	11	283	21
Cdkn2a	100	11	123	9	98	8	252	19
Atm	100	8	114	7	105	12	299	25
Bax	100	15	121	5	103	11	282	24
Caps2	100	18	99	13	96	10	403	36
