# Supplementary material for: An AMPK-dependent, non-canonical p53 pathway plays a key role in adipocyte metabolic reprogramming
Source: eLife. 2020 Dec 15;9:e63665. doi: 10.7554/eLife.63665 (PMC7758072; doi:10.7554/eLife.63665)
Supplement: Figure 2—source data 1. [file elife-63665-fig2-data1.xlsx]

## Sheet: Figure-2
Fig. 2B
	WT-1	WT-2	WT-3	KO-1	KO-2	KO-3	WT-Ave	WT-SD	KO-Ave	KO-SD
0	85	97	89	98	85	94	90.3333	6.1101	92.3333	6.65833
12	69	85	81	81	66	72	78.3333	8.32666	73	7.54983
24	73	83	79	74	61	65	78.3333	5.03322	66.6667	6.65833
36	64	72	69	49	36	41	68.3333	4.04145	42	6.55744
48	57	65	68	30	32	25	63.3333	5.68624	29	3.60555
60	33	49	47	5	0	1	43	8.7178	2	2.64575
Fig. 2D
		WT-1	WT-2	WT-3	KO-1	KO-2	KO-3	WT-Ave	WT-SD	KO-Ave	KO-SD
Basal Glycolysis		93	103	104	112	110	91	100	6.08276	104.333	11.5902
Glycolytic Capacity		105	89	106	167	139	142	100	9.53939	149.333	15.3731
Glycolytic Reserve		107	99	93	211	184	203	99.6667	7.02377	199.333	13.8684
Fig. 2E
WT-1	WT-2	WT-3	KO-1	KO-2	KO-3	WT-Ave	WT-SD	KO-Ave	KO-SD
109	96	97	168	142	154	100.667	7.23418	154.667	13.0128
Fig. 2F
WT-1	WT-2	WT-3	KO-1	KO-2	KO-3	WT-Ave	WT-SD	KO-Ave	KO-SD
119	84	98	104	93	104	100.333	17.6163	100.333	6.35085
Fig. 2G
	WT-1	WT-2	WT-3	KO-1	KO-2	KO-3	WT-Ave	WT-SD	KO-Ave	KO-SD
0	10	15	14	19	13	10	13	2.64575	14	4.58258
12	34	30	38	70	62	74	34	4	68.6667	6.1101
24	41	33	45	94	89	96	39.6667	6.1101	93	3.60555
36	61	55	63	159	173	169	59.6667	4.16333	167	7.2111
48	69	66	75	202	193	200	70	4.58258	198.333	4.72582
60	103	113	89	289	301	267	101.667	12.0554	285.667	17.2434
