# Supplementary material for: An AMPK-dependent, non-canonical p53 pathway plays a key role in adipocyte metabolic reprogramming
Source: eLife. 2020 Dec 15;9:e63665. doi: 10.7554/eLife.63665 (PMC7758072; doi:10.7554/eLife.63665)
Supplement: Figure 3—source data 1. [file elife-63665-fig3-data1.xlsx]

## Sheet: Figure-3
Fig. 3A
		WT-1	WT-2	WT-3	KO-1	KO-2	KO-3	WT-Ave	WT-SD	KO-Ave	KO-SD
Basal Respiration		127	84	91	73	91	82	100.667	23.0723	82	9
ATP Production		131	93	80	49	82	53	101.333	26.5016	61.3333	18.0093
Maximal Respiration		119	101	83	63	84	78	101	18	75	10.8167
Fig. 3B
WT-1	WT-2	WT-3	KO-1	KO-2	KO-3	WT-Ave	WT-SD	KO-Ave	KO-SD
0.83	1.18	0.98	0.42	0.51	0.49	0.996667	0.175594	0.473333	0.0472582
Fig. 3C
	WT-1	WT-2	WT-3	KO-1	KO-2	KO-3	WT-Ave	WT-SD	KO-Ave	KO-SD
GSH	0.68	0.51	0.42	0.89	0.62	0.77	0.536667	0.132035	0.76	0.135277
GSSG	0.53	0.43	0.53	0.16	0.31	0.26	0.496667	0.057735	0.243333	0.0763763
Fig. 3D
	WT-1	WT-2	WT-3	KO-1	KO-2	KO-3	WT-Ave	WT-SD	KO-Ave	KO-SD
Basal	127	94	79	80	92	89	100	24.5561	87	6.245
+FFA	587	631	590	309	382	321	602.667	24.5832	337.333	39.145
