# Supplementary material for: An AMPK-dependent, non-canonical p53 pathway plays a key role in adipocyte metabolic reprogramming
Source: eLife. 2020 Dec 15;9:e63665. doi: 10.7554/eLife.63665 (PMC7758072; doi:10.7554/eLife.63665)
Supplement: Figure 4—source data 1. [file elife-63665-fig4-data1.xlsx]

## Sheet: Figure-4
Fig. 4A
	WT-1	WT-2	WT-3	KO-1	KO-2	KO-3	WT-Ave	WT-SD	KO-Ave	KO-SD
0	0	0	0	0	0	0	0	0	0	0
12	8	7	14	6	4	5	9.66667	3.78594	5	1
24	17	12	13	5	8	6	14	2.64575	6.33333	1.52753
36	21	16	18	15	7	11	18.3333	2.51661	11	4
Fig. 4B
	Control-1	Control-2	Control-3	Fasting-1	Fasting-2	Fasting-3	WT-Ave	WT-SD	KO-Ave	KO-SD
WT	100	105	95	400	387	369	100	5	385.333	15.5671
p53-KO	85	90	92	215	210	154	89	3.60555	193	33.8674
Fig. 4D
	Basal-1	Basal-2	Basal-3	ISO-1	ISO-2	ISO-3	B-Ave	B-SD	I-Ave	I-SD
Control	87	115	98	437	368	461	100	14.1067	422	48.2804
LAL-RNAi	111	82	107	279	325	306	100	15.7162	303.333	23.1157
ATGL-RNAi	81	109	92	172	203	226	94	14.1067	200.333	27.0986
Double-RNAi	89	111	76	145	102	139	92	17.6918	128.667	23.2881
Fig. 4F
	WT-1	WT-2	WT-3	p53-KO-1	p53-KO-2	p53-KO-3	WT-Ave	WT-SD	KO-Ave	KO-SD
Control	109	100	91	68	59	44	100	9	57	12.1244
+ LAL	120	139	141	125	134	132	133.333	11.5902	130.333	4.72582
