# Supplementary material for: An AMPK-dependent, non-canonical p53 pathway plays a key role in adipocyte metabolic reprogramming
Source: eLife. 2020 Dec 15;9:e63665. doi: 10.7554/eLife.63665 (PMC7758072; doi:10.7554/eLife.63665)
Supplement: Figure 5—source data 1. [file elife-63665-fig5-data1.xlsx]

## Sheet: Figure-5
Fig. 5B
	Test-1	Test-2	Test-3	Ave	SD
IgG	0	6	0	2	3.4641
Control	69	129	103	100.333	30.0888
Fasting	549	521	692	587.333	91.7188
Refeeding	139	87	146	124	32.2335
Fig. 5D
	Test-1	Test-2	Test-3	Ave	SD
Control	2	29	0	10.3333	16.1967
WT	2893	3305	2707	2968.33	306.035
Δp53-RE	71	131	101	101	30
