# Supplementary material for: An AMPK-dependent, non-canonical p53 pathway plays a key role in adipocyte metabolic reprogramming
Source: eLife. 2020 Dec 15;9:e63665. doi: 10.7554/eLife.63665 (PMC7758072; doi:10.7554/eLife.63665)
Supplement: Figure 6—source data 1. [file elife-63665-fig6-data1.xlsx]

## Sheet: Figure-6
Fig. 6C
		test-1	test-2	test-3	Ave	SD
	Control	123	97	85	101.667	19.4251
	fasting	249	287	220	252	33.6006
	AICAR	389	337	329	351.667	32.5781
	Compond C +Fasting	109	131	149	129.667	20.0333
Fig. 6D
		test-1	test-2	test-3	Ave	SD
	Control	128	91	82	100.333	24.379
	fasting	479	403	459	447	39.3954
	Compond C +Fasting	134	173	152	153	19.5192
Fig. 6F
	WT-1	WT-2	WT-3	KO-1	KO-2	KO-3	WT-Ave	WT-SD	KO-Ave	KO-SD
Control	93	102	110	219	181	205	101.667	8.5049	201.667	19.218
Metformin	176	153	208	169	219	187	179	25.3246	191.667	25.3246
Fig. 6G
	WT-1	WT-2	WT-3	KO-1	KO-2	KO-3	WT-Ave	WT-SD	KO-Ave	KO-SD
Control	105	85	111	61	49	64	100.333	13.6137	58	7.93725
Metformin	52	67	54	51	49	69	57.6667	11.0151	56.3333	11.0151
