# Supplementary material for: An AMPK-dependent, non-canonical p53 pathway plays a key role in adipocyte metabolic reprogramming
Source: eLife. 2020 Dec 15;9:e63665. doi: 10.7554/eLife.63665 (PMC7758072; doi:10.7554/eLife.63665)
Supplement: Figure 7—source data 1. [file elife-63665-fig7-data1.xlsx]

## Sheet: Figure-7
Fig. 7E
	WT1	WT2	WT3	WT4	KO1	KO2	KO3	KO4	KO5	WT-ave	KO-Ave	WT-SD	KO-SD
Fed	24	27	26	23	26	23	28	22	25	25	24.8	1.82574	2.38747
Fasted	18	19	15	14	24	21	25	21	20	16.5	22.2	2.38048	2.16795
Fig. 7F
	WT1	WT2	WT3	WT4	KO1	KO2	KO3	KO4	KO5	WT-ave	KO-Ave	WT-SD	KO-SD
Fed	0.24	0.22	0.28	0.26	0.29	0.23	0.25	0.26	0.26	0.25	0.258	0.0258199	0.0216795
Fasted	0.07	0.1	0.06	0.11	0.2	0.21	0.17	0.18	0.15	0.085	0.182	0.0238048	0.0238747
Fig. 7G
	WT1	WT2	WT3	WT4	KO1	KO2	KO3	KO4	KO5	WT-ave	KO-Ave	WT-SD	KO-SD
Fed	128	112	130	110	119	110	107	123	119	120	115.6	10.4563	6.76757
Fasted	79	81	73	70	42	35	41	33	43	75.75	38.8	5.12348	4.49444
Fig. 7H
	WT1	WT2	WT3	WT4	KO1	KO2	KO3	KO4	KO5	WT-ave	KO-Ave	WT-SD	KO-SD
Fed	6	5.5	5.4	6.2	5.5	6.1	4.9	5.5	5	5.775	5.4	0.386221	0.479583
Fasted	19	18.5	14.9	13.5	9.8	8.8	9.5	8.9	9.2	16.475	9.24	2.69614	0.415933
Fig. 7J
	WT1	WT2	WT3	WT4	KO1	KO2	KO3	KO4	KO5	WT-ave	KO-Ave	WT-SD	KO-SD
Fed	1.8	1.1	1.1	1.3	1.3	1.7	1.5	1.3	1.8	1.325	1.52	0.330404	0.228035
Fasted	1.3	1.7	1.6	1	1.4	1.9	1.7	2	1.2	1.4	1.64	0.316228	0.336155
Fig. 7K
	WT1	WT2	WT3	WT4	KO1	KO2	KO3	KO4	KO5	WT-ave	KO-Ave	WT-SD	KO-SD
Fed	7.33	7.34	7.35	7.28	7.3	7.3	7.29	7.3	7.27	7.325	7.292	0.0310913	0.0130384
Fasted	7.31	7.32	7.29	7.28	7.3	7.31	7.29	7.32	7.32	7.3	7.308	0.0182574	0.0130384
Fig. 7M
	WT1	WT2	WT3	KO1	KO2	KO3	WT-ave	KO-Ave	WT-SD	KO-SD
Epi Fat	105	106	89	233	241	278	100	250.667	9.53939	24.0069
Muscle	96	109	94	195	223	185	99.6667	201	8.14453	19.6977
Fig. 7L
		mice-1	mice-2	mice-3	mice-4	mice-5	Ave	SD
0min	WT	1.3	1.4	1.8	1.5		1.5	0.216025
	KO	2.1	1.9	2.3	2	1.7	2	0.223607
15min	WT	10.5	12.1	9.7	13		11.325	1.4975
	KO	9.2	11	8.9	12.4	11	10.5	1.44568
30min	WT	12	9.9	11.2	8.2		10.325	1.66007
	KO	7.5	7.4	10.3	10.6	6.9	8.54	1.76153
60min	WT	8.7	8.1	9.1	7.6		8.375	0.660177
	KO	5.3	6.7	5.1	6.3	7.1	6.1	0.87178
90min	WT	5.7	6.6	5.3	6.9		6.125	0.75
	KO	2.7	3.3	2.9	3.1	3	3	0.223607
120min	WT	2.8	2.3	3.1	3.3		2.875	0.434933
	KO	1.7	2.2	1.5	2.6	2.1	2.02	0.432435
Fig. 7S
WT1	WT2	WT3	WT4	WT5	WT6	KO1	KO2	KO3	KO4	KO5	KO6	WT-ave	KO-Ave	WT-SD	KO-SD
37	31	40	28	33	35	32	38	40	30	32	38	34	35	4.58258	4.16333
Fig. 7T
WT1	WT2	WT3	WT4	WT5	WT6	KO1	KO2	KO3	KO4	KO5	KO6	WT-ave	KO-Ave	WT-SD	KO-SD
103	109	93	129	121	107	71	59	65	69	81	65	110.333	68.3333	8.0829	6
Fig. 7U
WT1	WT2	WT3	WT4	WT5	WT6	KO1	KO2	KO3	KO4	KO5	KO6	WT-ave	KO-Ave	WT-SD	KO-SD
3.3	3	3.1	2.5	2.5	2.4	1.9	2.1	2.3	1.5	2.1	1.8	2.8	1.95	0.152753	0.2
Fig. 7V
WT1	WT2	WT3	WT4	WT5	WT6	KO1	KO2	KO3	KO4	KO5	KO6	WT-ave	KO-Ave	WT-SD	KO-SD
5.9	6.2	6.7	5.7	7.2	5	4.5	5	5.5	4.2	4.1	4.9	6.11667	4.7	0.404145	0.5
Fig. 7W
		mice-1	mice-2	mice-3	mice-4	mice-5	mice-6	Ave	SD
0min	WT	121	98	104	114	102	114	108.833	8.81854
	KO	72	75	66	59	74	60	67.6667	7.06163
15min	WT	411	375	428	394	382	361	391.833	24.5391
	KO	374	401	362	350	420	350	376.167	28.6845
30min	WT	390	459	397	409	389	430	412.333	31.1702
	KO	310	382	391	389	351	347	361.667	34.5007
60min	WT	309	324	367	394	382	355	355.167	39.0427
	KO	248	271	229	249	285	237	253.167	21.8358
90min	WT	269	241	222	235	229	250	241	19.8221
	KO	137	142	123	170	152	131	142.5	17.5414
120min	WT	132	145	120	131	157	105	131.667	10.2307
	KO	95	107	88	126	89	111	102.667	15.8902
